# Supplementary material for: Therapeutic Potency of Ovothiol A on Ethanol-Induced Gastric Ulcers in Wistar Rats
Source: MDPI journal article supplement (doi:10.3390/md21010025), 2022-12-28
Supplement: s1 [file s1]

## Characterization of Ovothiol A

### 1. Material and methods

#### 1.1. InfraRed spectroscopy (JASCO FT 761 photometer at SIC-SFRC)

The functional groups of Ovothiol A were determined using infrared spectroscopy. The sample was mixed with KBr disc. The IR spectra were executed at a resolution of  $1\text{ cm}^{-1}$  (from  $4000$  to  $400\text{ cm}^{-1}$ ).

#### 1.2. Mass Spectroscopy

Shimadzu QP 2010 Plus (Kyoto, Japan) was used for LC-MS analysis. The electron energy was  $70\text{ eV}$ . A mass range from  $50$  to  $500\text{ m/z}$  was scanned at a rate of  $1000\text{ amu/s}$ , which was corresponded to  $0.5$  event time. The ion source temperature was  $250\text{ }^{\circ}\text{C}$ .

#### 1.3. High-performance liquid chromatography (HPLC) Analysis

An Agilent (USA) 1200 Series system with a binary pump (G1312A), a thermostatic column compartment (G1316A), and a diodearray detector was used to conduct the HPLC analysis (DAD; G4212B). With a Zorbax Eclipse Plus C18 column ( $250\text{ mm } 4.6\text{ mm}, 5\text{ m}$ , Agilent) and ultra-pure water mobile phase as the eluent, chromatographic separation was performed at a flow rate of  $1.0\text{ mL/min}$  at  $30\text{ }^{\circ}\text{C}$ . At  $215\text{ nm}$ .

### 2. Results

#### 2.1. IR spectra

The IR spectra of Ovothiol A (Figure S1) showed the peak at  $3459.67\text{ cm}^{-1}$  is assigned to O–H stretching vibration. The peak  $3231.32\text{ cm}^{-1}$  with strong intensity represents N–H stretching mode. The peak at  $2364.30\text{ cm}^{-1}$  corresponds to the  $\text{NH}_2$  group. The peak at  $1637.27\text{ cm}^{-1}$  indicating the C=O stretching mode of vibration. The  $\text{NH}_2$  bending vibrations occur at  $1637.27$  and  $873.59\text{ cm}^{-1}$ . The peaks at  $1458.89\text{ cm}^{-1}$  correspond to the C=S stretching. The peak at  $1127.19\text{ cm}^{-1}$  gives rise to C–N stretching mode of vibration. The spectra show absorption band in the region of  $1046.19\text{ cm}^{-1}$  which are due to in-plane C–H bending vibration. C–C–N stretching vibration obtained at  $873.59\text{ cm}^{-1}$ .

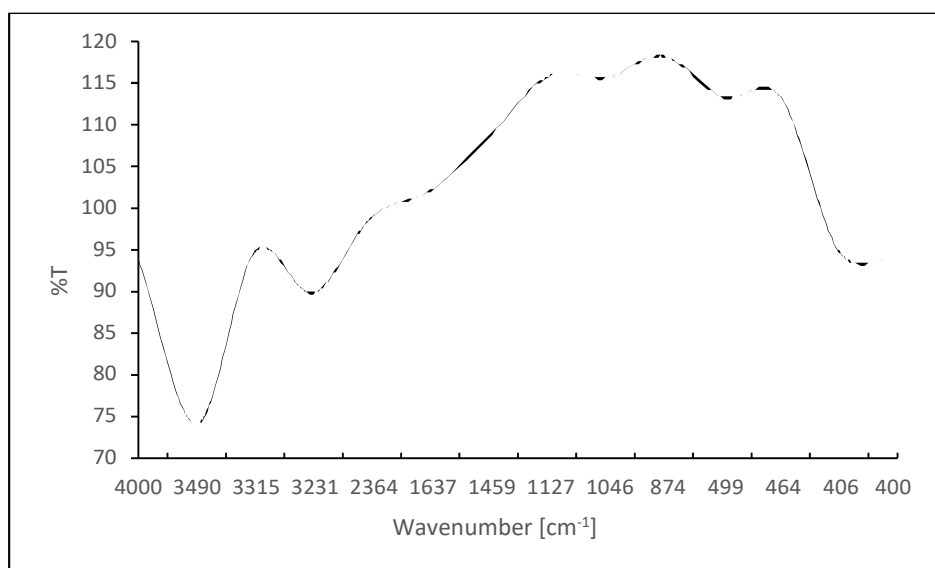

Figure S1. Infrared spectrum of ovothiol A.

## 2.2. The mass spectra

LC-MS of Ovothiol A showed remarkable peaks at ( $m/z$ ) 401 corresponding to molecular weight of Ovothiol A (Figure S2).

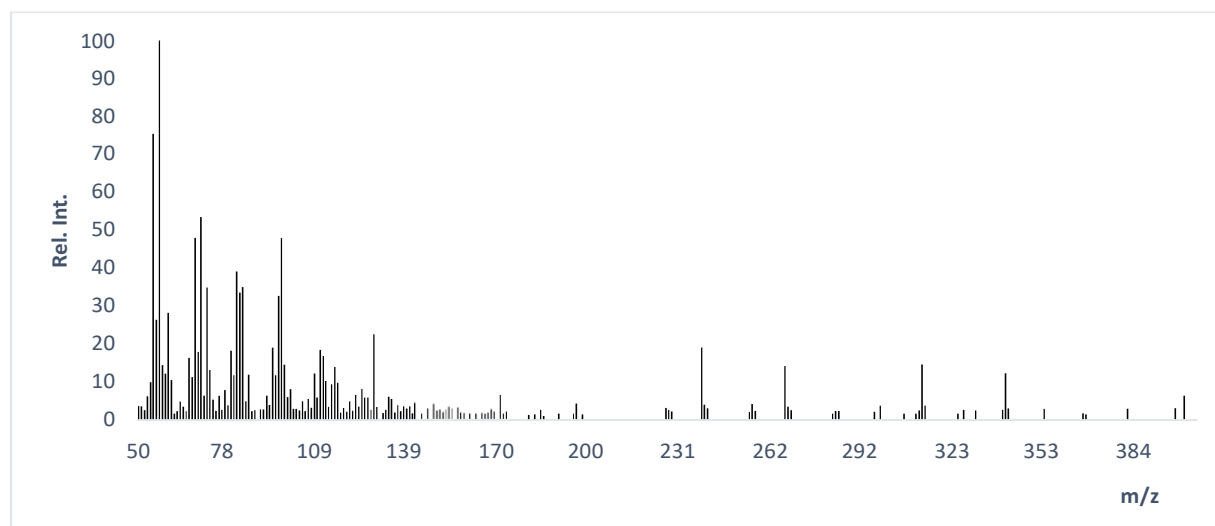

Figure S2. The mass spectra of ovothiol A.

### 2.3. HPLC

HPLC of the purified Ovothiol A showing the retention time at 4.87 min (Figure S3).

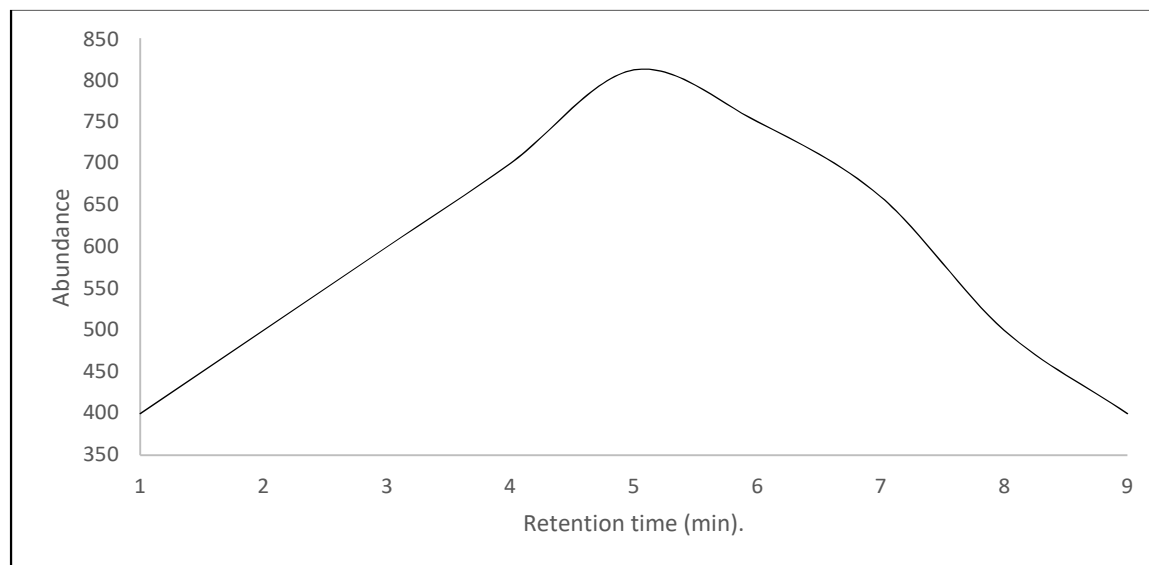

**Figure S3.** Thin layer chromatography (TLC) of the purified Ovothiol.

### 2.4. Physical properties of ovothiol A

Ovothiol A is a white crystal that is soluble in water and mineral acids (Table S1).

**Table S1:** The physical properties of Ovothio A.

|            |                                                                                                              |
|------------|--------------------------------------------------------------------------------------------------------------|
| Solubility | Soluble in water and Hydrochloric acid.<br>In soluble in methanol, ethanol, acetone, and dimethyl sulfoxide. |
| Appearance | Crystals                                                                                                     |
| Color      | White                                                                                                        |
